# Supplementary material for: Novel antibacterial activity of silver nanoparticles combined with pterostilbene against Staphylococcus aureus via induction of apoptosis-like cell death and downregulation of ribosomal gene expression
Source: Royal Society of Chemistry journal article supplement (doi:10.1039/d3en00176h), 2023-01-01
Supplement: d3en00176h1.pdf [file d3en00176h1.pdf]

Supplementary Files

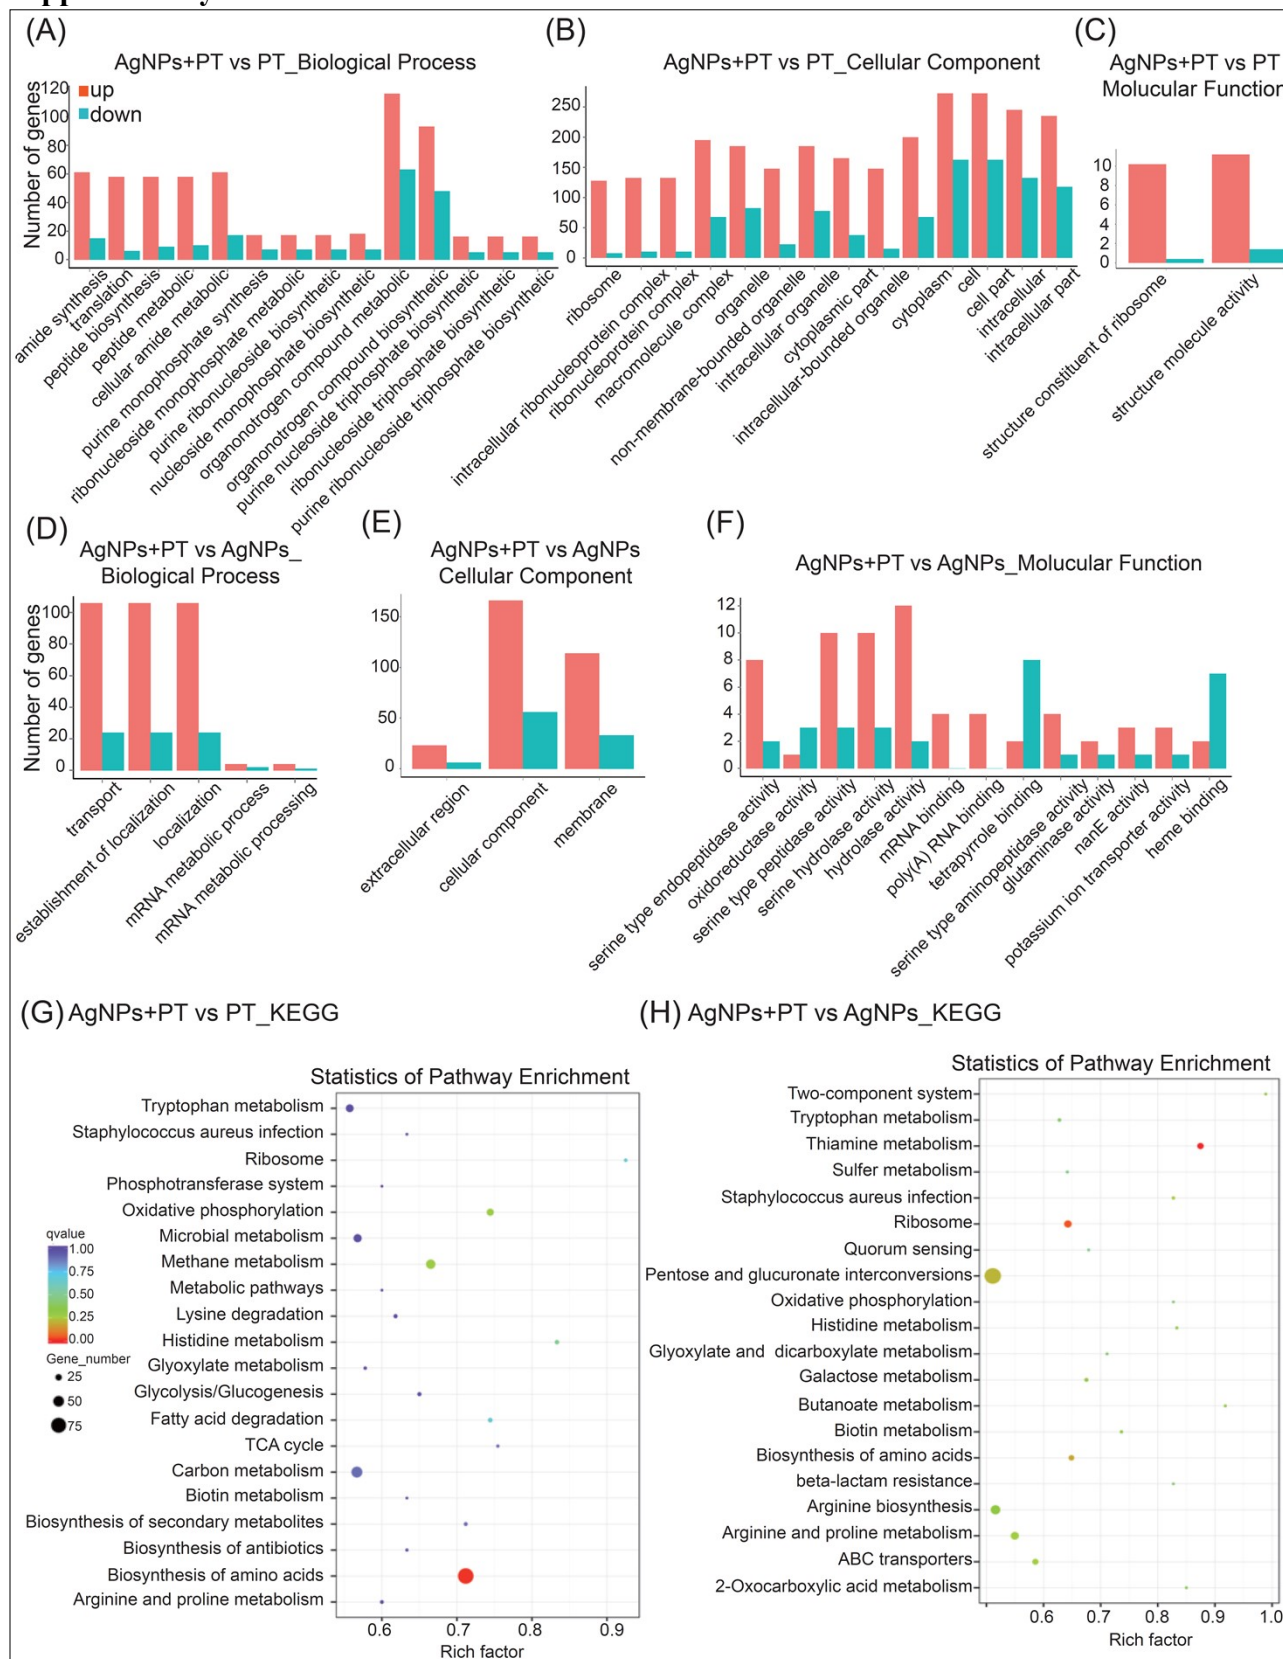

**Supplementary Figure 1.** The enrichment analysis of differentially expressed genes in GO and KEGG analysis between AgNPs + PT and PT alone (A-C, G), and between AgNPs + PT and AgNPs alone (D-F, H).
